# Supplementary material for: Ferulic acid ameliorates the quality of in vitro-aged bovine oocytes by suppressing oxidative stress and apoptosis
Source: publisher site journal article supplement (doi:10.18632/aging.205193), 2023-11-08
Supplement: Supplementary file [file aging-v15i21-205193-supplementary-material-SD1.pdf]

**SUPPLEMENTARY FIGURE**

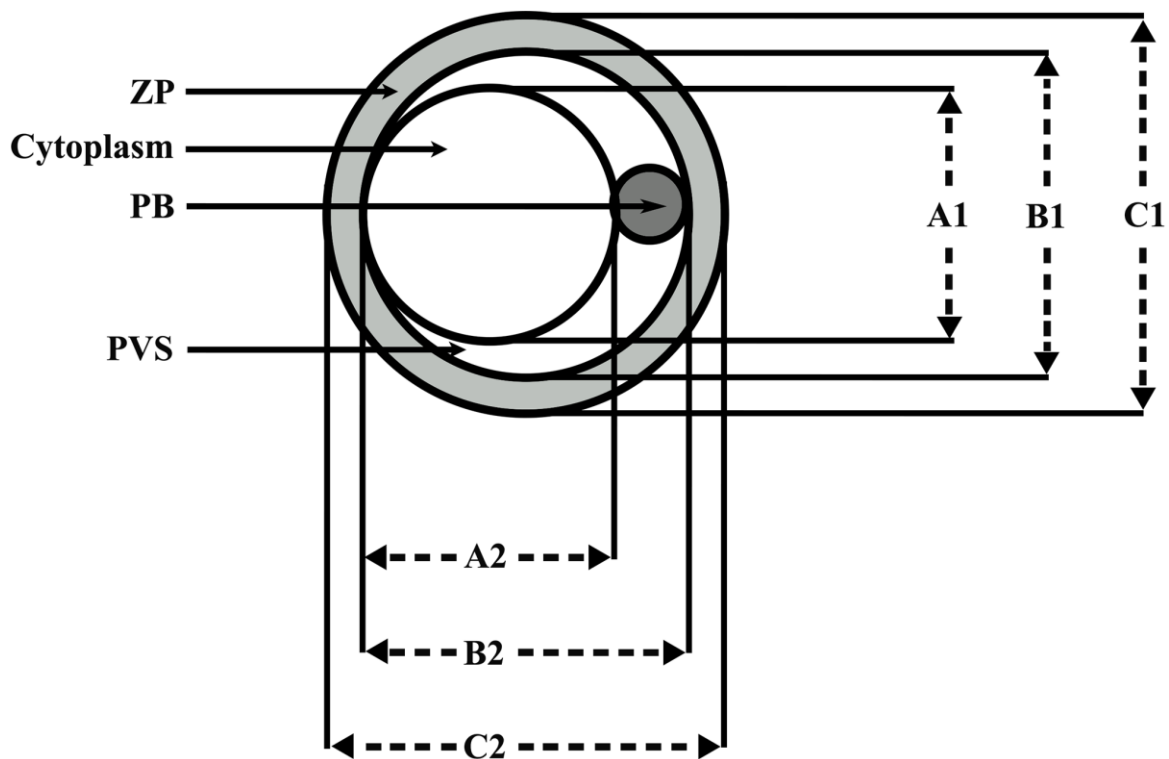

**Supplementary Figure 1. Calculation method for the size of each part of the oocyte.** Diameter of cytoplasm (A) =  $(A1 + A2)/2$ . Inner diameter of zona pellucida (B) =  $(B1 + B2)/2$ . Outer diameter of zona pellucida (C) =  $(C1 + C2)/2$ . Thickness of zona pellucida =  $(C - B)/2$ . Size of perivitelline space =  $(B - A)/2$ . Abbreviations: ZP: Zona pellucida; PVS: perivitelline space; PB: first polar body.
